# Supplementary material for: Vibrational spectroscopy and DFT calculations of the di-amino acid peptide l-aspartyl-l-glutamic acid in the zwitterionic state
Source: Royal Society of Chemistry journal article supplement (doi:10.1039/b903131f), 2009-01-01
Supplement: b903131f.pdf [file b903131f.pdf]

## Electronic Supplementary Information

### Vibrational spectroscopy and DFT calculations of the di-amino acid peptide L-aspartyl-L-glutamic acid in the zwitterionic state

N. Kausar, T. J. Dines, B. Z. Chowdhry and B. D. Alexander

**Table S1**

Comparison of computed (B3-LYP/cc-pVDZ) bond angles, and dihedral angles for different L-Asp-L-Glu models.

| $\theta / ^\circ$          | CPCM cluster with 10H <sub>2</sub> O | CPCM peptide only | Gas-phase cluster with 10H <sub>2</sub> O |
|----------------------------|--------------------------------------|-------------------|-------------------------------------------|
| $\theta(\text{H2N1C3})$    | 111.48                               | 108.64            | 111.97                                    |
| $\theta(\text{H2N1H29})$   | 106.74                               | 111.27            | 109.57                                    |
| $\theta(\text{H2N1H32})$   | 109.03                               | 109.28            | 107.80                                    |
| $\theta(\text{C3N1H29})$   | 110.49                               | 108.65            | 108.02                                    |
| $\theta(\text{C3N1H32})$   | 110.46                               | 111.76            | 111.76                                    |
| $\theta(\text{N1C3H4})$    | 107.79                               | 107.54            | 107.76                                    |
| $\theta(\text{N1C3C5})$    | 108.06                               | 106.48            | 106.81                                    |
| $\theta(\text{N1C3C7})$    | 110.32                               | 109.98            | 109.86                                    |
| $\theta(\text{H29N1H32})$  | 108.53                               | 107.26            | 107.63                                    |
| $\theta(\text{H4C3C5})$    | 108.26                               | 111.78            | 109.05                                    |
| $\theta(\text{H4C3C7})$    | 108.78                               | 110.73            | 109.24                                    |
| $\theta(\text{C5C3C7})$    | 113.47                               | 110.21            | 113.93                                    |
| $\theta(\text{C3C5O6})$    | 120.21                               | 118.40            | 119.60                                    |
| $\theta(\text{C3C5N13})$   | 114.95                               | 115.63            | 116.80                                    |
| $\theta(\text{C3C7H8})$    | 111.01                               | 109.81            | 110.40                                    |
| $\theta(\text{C3C7H9})$    | 109.51                               | 109.27            | 111.22                                    |
| $\theta(\text{C3C7C10})$   | 113.15                               | 113.70            | 114.54                                    |
| $\theta(\text{O6C5N13})$   | 124.81                               | 125.93            | 123.60                                    |
| $\theta(\text{C5N13H14})$  | 120.15                               | 122.07            | 119.73                                    |
| $\theta(\text{C5N13C15})$  | 124.31                               | 124.77            | 119.73                                    |
| $\theta(\text{H8C7H9})$    | 107.53                               | 106.89            | 105.87                                    |
| $\theta(\text{H8C7C10})$   | 110.62                               | 107.26            | 109.71                                    |
| $\theta(\text{H9C7C10})$   | 104.69                               | 109.67            | 104.63                                    |
| $\theta(\text{C7C10O11})$  | 113.01                               | 112.51            | 113.00                                    |
| $\theta(\text{C7C10O12})$  | 121.54                               | 123.64            | 122.96                                    |
| $\theta(\text{O11C10O12})$ | 125.39                               | 123.83            | 124.02                                    |
| $\theta(\text{C10O11H30})$ | 112.27                               | 108.55            | 112.26                                    |

|                            |        |        |        |
|----------------------------|--------|--------|--------|
| $\theta(\text{H14N13C15})$ | 114.97 | 112.89 | 113.14 |
| $\theta(\text{N13C15H16})$ | 107.34 | 108.54 | 108.07 |
| $\theta(\text{N13C15C17})$ | 109.02 | 107.92 | 107.77 |
| $\theta(\text{N13C15C19})$ | 107.82 | 110.51 | 109.17 |
| $\theta(\text{H16C15C17})$ | 107.49 | 108.24 | 106.82 |
| $\theta(\text{H16C15C19})$ | 110.59 | 108.29 | 110.77 |
| $\theta(\text{C17C15C19})$ | 114.35 | 113.23 | 114.03 |
| $\theta(\text{C15C17O18})$ | 117.00 | 116.65 | 117.43 |
| $\theta(\text{C15C17O28})$ | 116.67 | 115.52 | 115.75 |
| $\theta(\text{C15C19H20})$ | 107.16 | 107.22 | 107.78 |
| $\theta(\text{C15C19H21})$ | 109.14 | 109.12 | 109.63 |
| $\theta(\text{C15C19C22})$ | 116.59 | 114.79 | 115.45 |
| $\theta(\text{O18C17O28})$ | 126.33 | 127.83 | 126.82 |
| $\theta(\text{H20C19H21})$ | 106.89 | 107.46 | 106.44 |
| $\theta(\text{H20C19C22})$ | 108.25 | 108.96 | 108.90 |
| $\theta(\text{H21C19C22})$ | 108.41 | 109.03 | 108.27 |
| $\theta(\text{C19C22H23})$ | 111.21 | 112.23 | 111.52 |
| $\theta(\text{C19C22H24})$ | 107.00 | 109.37 | 107.97 |
| $\theta(\text{C19C22C25})$ | 111.03 | 114.25 | 111.70 |
| $\theta(\text{H23C22H24})$ | 109.78 | 106.54 | 108.52 |
| $\theta(\text{H23C22C25})$ | 110.41 | 108.77 | 109.49 |
| $\theta(\text{H24C22C25})$ | 107.26 | 105.18 | 107.49 |
| $\theta(\text{C22C25O26})$ | 122.51 | 125.23 | 122.67 |
| $\theta(\text{C22C25O27})$ | 114.39 | 111.92 | 113.84 |
| $\theta(\text{O26C25O27})$ | 123.06 | 122.66 | 123.46 |
| $\theta(\text{C25O27H31})$ | 109.12 | 107.24 | 109.76 |

| $\tau / ^\circ$          | CPCM cluster with 10H <sub>2</sub> O | CPCM peptide only | Gas-phase cluster with 10H <sub>2</sub> O |
|--------------------------|--------------------------------------|-------------------|-------------------------------------------|
| $\tau(\text{H2N1C3H4})$  | -60.50                               | -79.06            | -55.44                                    |
| $\tau(\text{H2N1C3C5})$  | -177.29                              | 160.99            | -172.48                                   |
| $\tau(\text{H2N1C3C7})$  | 58.14                                | 41.59             | 63.49                                     |
| $\tau(\text{H4C3N1H29})$ | -179.02                              | 159.75            | -176.17                                   |
| $\tau(\text{C5C3N1H29})$ | 64.20                                | 39.80             | 66.79                                     |
| $\tau(\text{C7C3N1H29})$ | -60.37                               | -79.60            | -57.24                                    |
| $\tau(\text{H4C3N1H32})$ | 60.88                                | 41.59             | 65.62                                     |
| $\tau(\text{C5C3N1H32})$ | -55.91                               | -78.36            | -51.43                                    |
| $\tau(\text{C7C3N1H32})$ | 179.52                               | 162.25            | -175.45                                   |
| $\tau(\text{N1C3C5O6})$  | -1.97                                | -28.55            | 5.66                                      |
| $\tau(\text{N1C3C5N13})$ | 176.28                               | 153.72            | -175.27                                   |
| $\tau(\text{N1C3C7H8})$  | 48.57                                | 64.35             | 46.62                                     |
| $\tau(\text{N1C3C7H9})$  | 167.15                               | -178.71           | 163.84                                    |
| $\tau(\text{N1C3C7C10})$ | -76.49                               | -55.82            | -77.80                                    |
| $\tau(\text{H4C3C5O6})$  | -118.45                              | -145.72           | -110.53                                   |

|                             |         |         |         |
|-----------------------------|---------|---------|---------|
| $\tau(\text{H4C3C5N13})$    | 59.80   | 36.56   | 68.53   |
| $\tau(\text{H4C3C7H8})$     | 166.60  | -176.94 | 164.63  |
| $\tau(\text{H4C3C7H9})$     | -74.82  | -59.99  | -78.15  |
| $\tau(\text{H4C3C7C10})$    | 41.54   | 62.89   | 40.21   |
| $\tau(\text{O6C5C3C7})$     | 120.70  | 90.70   | 127.15  |
| $\tau(\text{N13C5C3C7})$    | -61.06  | -87.03  | -53.78  |
| $\tau(\text{C5C3C7H8})$     | -72.84  | -52.74  | -73.16  |
| $\tau(\text{C5C3C7H9})$     | 45.74   | 64.20   | 44.06   |
| $\tau(\text{C5C3C7C10})$    | 162.10  | -172.91 | 162.42  |
| $\tau(\text{C3C5N13H14})$   | 7.84    | -1.01   | 16.68   |
| $\tau(\text{C3C5N13C15})$   | 178.75  | 172.54  | 164.58  |
| $\tau(\text{C3C7C10O11})$   | 147.46  | -151.23 | 168.05  |
| $\tau(\text{C3C7C10O12})$   | -35.19  | 30.41   | -13.61  |
| $\tau(\text{O6C5N13H14})$   | -174.00 | -178.54 | -164.29 |
| $\tau(\text{O6C5N13C15})$   | -3.09   | -4.99   | -16.39  |
| $\tau(\text{C5N13C15H16})$  | 13.18   | -41.43  | 40.12   |
| $\tau(\text{C5N13C15C17})$  | -102.97 | -158.52 | -74.98  |
| $\tau(\text{C5N13C15C19})$  | 132.35  | 77.18   | 160.67  |
| $\tau(\text{H8C7C10O11})$   | 22.19   | 87.17   | 43.26   |
| $\tau(\text{H8C7C10O12})$   | -160.46 | -91.19  | -138.40 |
| $\tau(\text{H9C7C10O11})$   | -93.36  | -28.56  | -69.92  |
| $\tau(\text{H9C7C10O12})$   | 83.98   | 153.08  | 108.42  |
| $\tau(\text{C7C10O11H30})$  | 173.14  | -176.54 | 176.53  |
| $\tau(\text{H30O11C10O12})$ | -4.08   | 1.81    | -1.79   |
| $\tau(\text{H14N13C15H16})$ | -175.49 | 132.64  | -170.01 |
| $\tau(\text{H14N13C15C17})$ | 68.36   | 15.56   | 74.90   |
| $\tau(\text{H14N13C15C19})$ | -56.32  | -108.75 | -49.45  |
| $\tau(\text{N13C15C17O18})$ | -67.22  | -13.24  | -54.04  |
| $\tau(\text{N13C15C17O28})$ | 112.38  | 167.22  | 125.29  |
| $\tau(\text{N13C15C19H20})$ | -59.71  | -57.54  | -73.50  |
| $\tau(\text{N13C15C19H21})$ | 55.69   | 58.56   | 41.96   |
| $\tau(\text{N13C15C19C22})$ | 178.89  | -178.73 | 164.53  |
| $\tau(\text{H16C15C17O18})$ | 176.73  | -130.52 | -169.96 |
| $\tau(\text{H16C15C17O28})$ | -3.67   | 49.93   | 9.38    |
| $\tau(\text{H16C15C19H20})$ | 57.37   | 61.22   | 45.38   |
| $\tau(\text{H16C15C19H21})$ | 172.78  | 177.32  | 160.84  |
| $\tau(\text{H16C15C19C22})$ | -64.03  | -59.97  | -76.58  |
| $\tau(\text{O18C17C15C19})$ | 53.54   | 109.42  | 67.32   |
| $\tau(\text{O28C17C15C19})$ | -126.87 | -70.13  | -113.34 |
| $\tau(\text{C17C15C19H20})$ | 178.87  | -178.75 | 165.91  |
| $\tau(\text{C17C15C19H21})$ | -65.72  | -62.64  | -78.62  |
| $\tau(\text{C17C15C19C22})$ | 57.47   | 60.06   | 43.95   |
| $\tau(\text{C15C19C22H23})$ | 45.88   | 37.47   | 47.30   |
| $\tau(\text{C15C19C22H24})$ | 165.76  | 155.48  | 166.43  |
| $\tau(\text{C15C19C22C25})$ | -77.49  | -86.95  | -75.59  |
| $\tau(\text{H20C19C22H23})$ | -74.95  | -82.77  | -74.06  |
| $\tau(\text{H20C19C22H24})$ | 44.93   | 35.25   | 45.07   |
| $\tau(\text{H20C19C22C25})$ | 161.68  | 152.81  | 163.05  |

|                             |         |         |         |
|-----------------------------|---------|---------|---------|
| $\tau(\text{H21C19C22H23})$ | 169.45  | 160.22  | 170.59  |
| $\tau(\text{H21C19C22H24})$ | -70.67  | -81.76  | -70.27  |
| $\tau(\text{H21C19C22C25})$ | 46.08   | 35.80   | 47.71   |
| $\tau(\text{C19C22C25O26})$ | -72.29  | -25.60  | -59.58  |
| $\tau(\text{C19C22C25O27})$ | 105.32  | 159.20  | 118.66  |
| $\tau(\text{H23C22C25O26})$ | 163.89  | -151.85 | 176.39  |
| $\tau(\text{H23C22C25O27})$ | -18.51  | 32.95   | -5.38   |
| $\tau(\text{H24C22C25O26})$ | 44.30   | 94.33   | 58.69   |
| $\tau(\text{H24C22C25O27})$ | -138.09 | -80.86  | -123.08 |
| $\tau(\text{C22C25O27H31})$ | -152.92 | 176.49  | -153.40 |
| $\tau(\text{O26C25O27H31})$ | 24.6706 | 1.1503  | 24.8176 |

**Table S2**

Definitions of internal coordinates adapted to local symmetry.

| No. | Definition                  | Description                                                                                                                                                   |
|-----|-----------------------------|---------------------------------------------------------------------------------------------------------------------------------------------------------------|
| 1   | $v(\text{O11H30})$          | $r(\text{O11H30})$                                                                                                                                            |
| 2   | $v(\text{O27H31})$          | $r(\text{O27H31})$                                                                                                                                            |
| 3   | $v(\text{N13H14})$          | $r(\text{N13H14})$                                                                                                                                            |
| 4   | $v(\text{N1H2})$            | $r(\text{N1H2})$                                                                                                                                              |
| 5   | $v(\text{N1H29})$           | $r(\text{N1H29})$                                                                                                                                             |
| 6   | $v(\text{N1H32})$           | $r(\text{N1H32})$                                                                                                                                             |
| 7   | $v_s(\text{CH}_2)$          | $1/\sqrt{2} [r(\text{C7H8})+r(\text{C7H9})]$                                                                                                                  |
| 8   | $v_{as}(\text{CH}_2)$       | $1/\sqrt{2} [r(\text{C7H8})-r(\text{C7H9})]$                                                                                                                  |
| 9   | $v_s(\text{CH}_2')$         | $1/\sqrt{2} [r(\text{C19H20})+r(\text{C19H21})]$                                                                                                              |
| 10  | $v_{as}(\text{CH}_2')$      | $1/\sqrt{2} [r(\text{C19H20})-r(\text{C19H21})]$                                                                                                              |
| 11  | $v_s(\text{CH}_2'')$        | $1/\sqrt{2} [r(\text{C22H23})+r(\text{C22H24})]$                                                                                                              |
| 12  | $v_{as}(\text{CH}_2'')$     | $1/\sqrt{2} [r(\text{C22H23})-r(\text{C22H24})]$                                                                                                              |
| 13  | $v(\text{C3H4})$            | $r(\text{C3H4})$                                                                                                                                              |
| 14  | $v(\text{C15H16})$          | $r(\text{C15H16})$                                                                                                                                            |
| 15  | $v(\text{C5O6})$            | $r(\text{C5O6})$                                                                                                                                              |
| 16  | $v(\text{C10O12})$          | $r(\text{C10O12})$                                                                                                                                            |
| 17  | $v(\text{C25O26})$          | $r(\text{C25O26})$                                                                                                                                            |
| 18  | $v_s(\text{CO}_2)$          | $1/\sqrt{2} [r(\text{C17O18})+r(\text{C17O28})]$                                                                                                              |
| 19  | $v_{as}(\text{CO}_2)$       | $1/\sqrt{2} [r(\text{C17O18})-r(\text{C17O28})]$                                                                                                              |
| 20  | $v(\text{C10O11})$          | $r(\text{C10O11})$                                                                                                                                            |
| 21  | $v(\text{C25O27})$          | $r(\text{C25O27})$                                                                                                                                            |
| 22  | $v(\text{C3N1})$            | $r(\text{C3N1})$                                                                                                                                              |
| 23  | $v(\text{C5N13})$           | $r(\text{C5N13})$                                                                                                                                             |
| 24  | $v(\text{C15N13})$          | $r(\text{C15N13})$                                                                                                                                            |
| 25  | $v(\text{C3N1})$            | $r(\text{C3N1})$                                                                                                                                              |
| 26  | $v(\text{C7C10})$           | $r(\text{C7C10})$                                                                                                                                             |
| 27  | $v(\text{C3C7})$            | $r(\text{C3C7})$                                                                                                                                              |
| 28  | $v(\text{C3C5})$            | $r(\text{C3C5})$                                                                                                                                              |
| 29  | $v(\text{C15C17})$          | $r(\text{C15C17})$                                                                                                                                            |
| 30  | $v(\text{C15C19})$          | $r(\text{C15C19})$                                                                                                                                            |
| 31  | $v(\text{C19C22})$          | $r(\text{C19C22})$                                                                                                                                            |
| 32  | $v(\text{C22C25})$          | $r(\text{C22C25})$                                                                                                                                            |
| 33  | $\delta(\text{C10O11H30})$  | $\theta(\text{C10O11H30})$                                                                                                                                    |
| 34  | $\delta(\text{C25O27H31})$  | $\theta(\text{C10O27H31})$                                                                                                                                    |
| 35  | $\delta_{ip}(\text{NH})$    | $\theta(\text{C5N13H14}) - \theta(\text{C15N13H14})$                                                                                                          |
| 36  | $\delta_s(\text{NH}_3)$     | $1/\sqrt{6}[\theta(\text{C3N1H2})+\theta(\text{C3N1H29})+\theta(\text{C3N1H32})$<br>$-\theta(\text{H29N1H32})-\theta(\text{C2N1H29})-\theta(\text{H2N1H32})]$ |
| 37  | $\delta_{as}(\text{NH}_3)$  | $1/\sqrt{6}[2\theta(\text{H29N1H32})-\theta(\text{C2N1H29})-\theta(\text{H2N1H32})]$                                                                          |
| 38  | $\delta_{as'}(\text{NH}_3)$ | $1/\sqrt{2}[\theta(\text{C2N1H29})-\theta(\text{H2N1H32})]$                                                                                                   |
| 39  | $\rho_{ip}(\text{NH}_3)$    | $1/\sqrt{6}[2\theta(\text{C3N1H2})-\theta(\text{C3N1H29})-\theta(\text{C3N1H32})]$                                                                            |
| 40  | $\rho_{op}(\text{NH}_3)$    | $1/\sqrt{2}[\theta(\text{C3N1H29})-\theta(\text{C3N1H32})]$                                                                                                   |

|    |                                   |                                                                                                                                                                                              |
|----|-----------------------------------|----------------------------------------------------------------------------------------------------------------------------------------------------------------------------------------------|
| 41 | $\delta(\text{CH}_2)$             | $1/2\sqrt{6}[(2+\sqrt{6})\theta(\text{H8C7H9})+(2-\sqrt{6})\theta(\text{C3C7C10})-\theta(\text{C3C7H8})-\theta(\text{C3C7H9})-\theta(\text{C10C7H8})-\theta(\text{C10C7H9})]$                |
| 42 | $\delta(\text{C3C7C10})$          | $1/2\sqrt{6}[(2-\sqrt{6})\theta(\text{H8C7H9})+(2+\sqrt{6})\theta(\text{C3C7C10})-\theta(\text{C3C7H8})-\theta(\text{C3C7H9})-\theta(\text{C10C7H8})-\theta(\text{C10C7H9})]$                |
| 43 | $\rho(\text{CH}_2)$               | $1/2[\theta(\text{C3C7H8})-\theta(\text{C3C7H9})+\theta(\text{C10C7H8})-\theta(\text{C10C7H9})]$                                                                                             |
| 44 | $\omega(\text{CH}_2)$             | $1/2[\theta(\text{C3C7H8})+\theta(\text{C3C7H9})-\theta(\text{C10C7H8})-\theta(\text{C10C7H9})]$                                                                                             |
| 45 | $\tau(\text{CH}_2)$               | $1/2[\theta(\text{C3C7H8})-\theta(\text{C3C7H9})-\theta(\text{C10C7H8})+\theta(\text{C10C7H9})]$                                                                                             |
| 46 | $\delta(\text{CH}_2')$            | $1/2\sqrt{6}[(2+\sqrt{6})\theta(\text{H20C19H21})+(2-\sqrt{6})\theta(\text{C15C19C22})-\theta(\text{C15C19H20})-\theta(\text{C15C19H21})-\theta(\text{C22C19H20})-\theta(\text{C22C19H21})]$ |
| 47 | $\delta(\text{C15C19C22})$        | $1/2\sqrt{6}[(2-\sqrt{6})\theta(\text{H20C19H21})+(2+\sqrt{6})\theta(\text{C15C19C22})-\theta(\text{C15C19H20})-\theta(\text{C15C19H21})-\theta(\text{C22C19H20})-\theta(\text{C22C19H21})]$ |
| 48 | $\rho(\text{CH}_2')$              | $1/2[\theta(\text{C15C19H20})-\theta(\text{C15C19H21})+\theta(\text{C22C19H20})-\theta(\text{C22C19H21})]$                                                                                   |
| 49 | $\omega(\text{CH}_2')$            | $1/2[\theta(\text{C15C19H20})+\theta(\text{C15C19H21})-\theta(\text{C22C19H20})-\theta(\text{C22C19H21})]$                                                                                   |
| 50 | $\tau(\text{CH}_2')$              | $1/2[\theta(\text{C15C19H20})-\theta(\text{C15C19H21})-\theta(\text{C22C19H20})+\theta(\text{C22C19H21})]$                                                                                   |
| 51 | $\delta(\text{CH}_2'')$           | $1/2\sqrt{6}[(2+\sqrt{6})\theta(\text{H23C22H24})+(2-\sqrt{6})\theta(\text{C19C22C25})-\theta(\text{C19C22H23})-\theta(\text{C19C22H24})-\theta(\text{C25C22H23})-\theta(\text{C25C22H24})]$ |
| 52 | $\delta(\text{C19C22C25})$        | $1/2\sqrt{6}[(2-\sqrt{6})\theta(\text{H23C22H24})+(2+\sqrt{6})\theta(\text{C19C22C25})-\theta(\text{C19C22H23})-\theta(\text{C19C22H24})-\theta(\text{C25C22H23})-\theta(\text{C25C22H24})]$ |
| 53 | $\rho(\text{CH}_2'')$             | $1/2[\theta(\text{C19C22H23})-\theta(\text{C19C22H24})+\theta(\text{C25C22H23})-\theta(\text{C25C22H24})]$                                                                                   |
| 54 | $\omega(\text{CH}_2'')$           | $1/2[\theta(\text{C19C22H23})+\theta(\text{C19C22H24})-\theta(\text{C25C22H23})-\theta(\text{C25C22H24})]$                                                                                   |
| 55 | $\tau(\text{CH}_2'')$             | $1/2[\theta(\text{C19C22H23})-\theta(\text{C19C22H24})-\theta(\text{C25C22H23})+\theta(\text{C25C22H24})]$                                                                                   |
| 56 | $\delta(\text{C3H4})$             | $1/\sqrt{6}[2\theta(\text{N1C3H4})-\theta(\text{C5C3H4})-\theta(\text{C7C3H4})]$                                                                                                             |
| 57 | $\delta'(\text{C3H4})$            | $1/\sqrt{2}[\theta(\text{C5C3H4})-\theta(\text{C7C3H4})]$                                                                                                                                    |
| 58 | $\delta(\text{C5C3C7})$           | $\theta(\text{C5C3C7})$                                                                                                                                                                      |
| 59 | $\delta(\text{N1C3C5})$           | $\theta(\text{N1C3C5})$                                                                                                                                                                      |
| 60 | $\delta(\text{N1C3C7})$           | $\theta(\text{N1C3C7})$                                                                                                                                                                      |
| 61 | $\delta(\text{C15H16})$           | $1/\sqrt{6}[2\theta(\text{N13C15H16})-\theta(\text{C17C15H16})-\theta(\text{C19C15H16})]$                                                                                                    |
| 62 | $\delta'(\text{C15H16})$          | $1/\sqrt{2}[\theta(\text{C17C15H16})-\theta(\text{C19C15H16})]$                                                                                                                              |
| 63 | $\delta(\text{C17C15C19})$        | $\theta(\text{C17C15C19})$                                                                                                                                                                   |
| 64 | $\delta(\text{C17C15N13})$        | $\theta(\text{C17C15N13})$                                                                                                                                                                   |
| 65 | $\delta(\text{C19C15N13})$        | $\theta(\text{C19C15N13})$                                                                                                                                                                   |
| 66 | $\delta(\text{C3C5N13})$          | $1/\sqrt{6}[2\theta(\text{C3C5N13})-\theta(\text{C3C5O6})-\theta(\text{N13C5O6})]$                                                                                                           |
| 67 | $\delta_{\text{ip}}(\text{C5O6})$ | $1/\sqrt{2}[\theta(\text{C3C5O6})-\theta(\text{N13C5O6})]$                                                                                                                                   |
| 68 | $\delta(\text{O11C10O12})$        | $1/\sqrt{6}[2\theta(\text{O11C10O12})-\theta(\text{C7C10O11})-\theta(\text{C7C10O12})]$                                                                                                      |
| 69 | $\rho(\text{O11C10O12})$          | $1/\sqrt{2}[\theta(\text{C7C10O11})-\theta(\text{C7C10O12})]$                                                                                                                                |
| 70 | $\delta(\text{C5N13C15})$         | $1/\sqrt{6}[2\theta(\text{C5N13C15})-\theta(\text{C5N13H14})-\theta(\text{C15N13H14})]$                                                                                                      |
| 71 | $\delta(\text{O18C17O28})$        | $1/\sqrt{6}[2\theta(\text{O18C17O28})-\theta(\text{C15C17O18})-\theta(\text{C15C17O28})]$                                                                                                    |
| 72 | $\rho(\text{O18C17O28})$          | $1/\sqrt{2}[\theta(\text{C15C17O18})-\theta(\text{C15C17O28})]$                                                                                                                              |
| 73 | $\delta(\text{O26C25O27})$        | $1/\sqrt{6}[2\theta(\text{O26C25O27})-\theta(\text{C22C25O26})-\theta(\text{C22C25O26})]$                                                                                                    |
| 74 | $\rho(\text{O26C25O27})$          | $1/\sqrt{6}[\theta(\text{C22C25O26})-\theta(\text{C22C25O26})]$                                                                                                                              |
| 75 | $\omega(\text{O11C10O12})$        | $\phi(\text{C7C10})$                                                                                                                                                                         |

|    |                                   |                                                                                                                                                                                                                                                  |
|----|-----------------------------------|--------------------------------------------------------------------------------------------------------------------------------------------------------------------------------------------------------------------------------------------------|
| 76 | $\delta(\text{O26C25O27})$        | $\phi(\text{C22C25})$                                                                                                                                                                                                                            |
| 77 | $\delta_{\text{op}}(\text{C5O6})$ | $\phi(\text{C5O6})$                                                                                                                                                                                                                              |
| 78 | $\omega(\text{O18C17O28})$        | $\phi(\text{C15C17})$                                                                                                                                                                                                                            |
| 79 | $\delta_{\text{op}}(\text{NH})$   | $\phi(\text{N13H14})$                                                                                                                                                                                                                            |
| 80 | $\tau(\text{C10O11})$             | $1/\sqrt{2}[\tau(\text{C7C10O11H30})+\tau(\text{O12C10O11H30})]$                                                                                                                                                                                 |
| 81 | $\tau(\text{C7C10})$              | $1/\sqrt{6}[\tau(\text{C3C7C10O11})+\tau(\text{C3C7C10O12})+\tau(\text{C8C7C10O11})+\tau(\text{C8C7C10O12})+\tau(\text{C9C7C10O11})+\tau(\text{C9C7C10O12})]$                                                                                    |
| 82 | $\tau(\text{C3C7})$               | $1/3[\tau(\text{C8C7C3N1})+\tau(\text{C8C7C3C4})+\tau(\text{C8C7C3C5})+\tau(\text{C9C7C3N1})+\tau(\text{C9C7C3C4})+\tau(\text{C9C7C3C5})+\tau(\text{C10C7C3N1})+\tau(\text{C10C7C3C4})+\tau(\text{C10C7C3C5})]$                                  |
| 83 | $\tau(\text{N1C3})$               | $1/3[\tau(\text{C4C3N1H2})+\tau(\text{C4C3N1H29})+\tau(\text{C4C3N1H32})+\tau(\text{C5C3N1H2})+\tau(\text{C5C3N1H29})+\tau(\text{C5C3N1H32})+\tau(\text{C7C3N1H2})+\tau(\text{C7C3N1H29})+\tau(\text{C7C3N1H32})]$                               |
| 84 | $\tau(\text{C3C5})$               | $1/\sqrt{6}[\tau(\text{N1C3C5O6})+\tau(\text{N1C3C5N13})+\tau(\text{C4C3C5O6})+\tau(\text{C4C3C5N13})+\tau(\text{C7C3C5O6})+\tau(\text{C7C3C5N13})]$                                                                                             |
| 85 | $\tau(\text{C5N13})$              | $1/2[\tau(\text{C3C5N13H14})+\tau(\text{C3C5N13C15})+\tau(\text{O6C5N13H14})+\tau(\text{O6C5N13C15})]$                                                                                                                                           |
| 86 | $\tau(\text{N13C15})$             | $1/\sqrt{6}[\tau(\text{C5N13C15H16})+\tau(\text{C5N13C15C17})+\tau(\text{C5N13C15C19})+\tau(\text{H14N13C15H16})+\tau(\text{H14N13C15C17})+\tau(\text{H14N13C15C19})]$                                                                           |
| 87 | $\tau(\text{C15C19})$             | $1/3[\tau(\text{N13C15C19H20})+\tau(\text{N13C15C19H21})+\tau(\text{N13C15C19C22})+\tau(\text{H16C15C19H20})+\tau(\text{H16C15C19H21})+\tau(\text{H16C15C19C22})+\tau(\text{C17C15C19H20})+\tau(\text{C17C15C19H21})+\tau(\text{C17C15C19C22})]$ |
| 88 | $\tau(\text{C19C22})$             | $1/3[\tau(\text{C15C19C22H23})+\tau(\text{C15C19C22H24})+\tau(\text{C15C19C22C25})+\tau(\text{H20C19C22H23})+\tau(\text{H20C19C22H24})+\tau(\text{H20C19C22C25})+\tau(\text{H21C19C22H23})+\tau(\text{H21C19C22H24})+\tau(\text{H21C19C22C25})]$ |
| 89 | $\tau(\text{C22C25})$             | $1/\sqrt{6}[\tau(\text{C19C22C25O26})+\tau(\text{C19C22C25O27})+\tau(\text{H23C22C25O26})+\tau(\text{H23C22C25O27})+\tau(\text{H24C22C25O26})+\tau(\text{H24C22C25O27})]$                                                                        |
| 90 | $\tau(\text{C25O27})$             | $1/\sqrt{2}[\tau(\text{C22C25O27H31})+\tau(\text{O26C25O27H31})]$                                                                                                                                                                                |

Defintions of out-of-plane angles:

$\phi(\text{C7C10})$  = angle between the bond C7C10 and the plane containing atoms C10, O11, O12  
 $\phi(\text{C22C25})$  = angle between the bond C22C25 and the plane containing atoms C25, O26, O27  
 $\phi(\text{C5O6})$  = angle between the bond C5O6 and the plane containing atoms C3, C5, N13  
 $\phi(\text{C15C17})$  = angle between the bond C15C17 and the plane containing atoms C17, O18, O28  
 $\phi(\text{N13H14})$  = angle between the bond N13H14 and the plane containing atoms C5, C15, N13

Abbreviations:

v = stretching, as = anti-symmetric, s = symmetric,  $\delta$  = deformation,  
 $\omega$  = wagging,  $\tau$  = twisting,  $\rho$  = rocking, ip = in-plane, op = out-of-plane
